# Supplementary material for: Facile synthesis of micrometer-long antimony nanowires by template-free electrodeposition for next generation Li-ion batteries
Source: Royal Society of Chemistry journal article supplement (doi:10.1039/c6ta04731a), 2016-01-01
Supplement: c6ta04731a1.pdf [file c6ta04731a1.pdf]

## Supporting Information

### Facile Synthesis of Micrometer-Long Antimony Nanowires by Template-Free Electrodeposition for Next Generation Li-ion Batteries

R. Al-Salman,<sup>a\*</sup> S. J. Sedlmaier,<sup>a</sup> H. Sommer,<sup>ab</sup> T. Brezesinski<sup>a\*</sup> and J. Janek<sup>ac</sup>

<sup>a</sup>Battery and Electrochemistry Laboratory, Institute of Nanotechnology, Karlsruhe Institute of Technology, Hermann-von-Helmholtz-Platz 1, 76344 Eggenstein-Leopoldshafen, Germany.

<sup>b</sup>BASF SE, 67056 Ludwigshafen, Germany.

<sup>c</sup>Institute of Physical Chemistry, Justus-Liebig-University Giessen, Heinrich-Buff-Ring 17, 35392 Giessen, Germany.

\*[torsten.brezesinski@kit.edu](mailto:torsten.brezesinski@kit.edu), phone: +49 721 608 28827

\*[rihab.al-salman@kit.edu](mailto:rihab.al-salman@kit.edu), phone: +49 721 608 23574

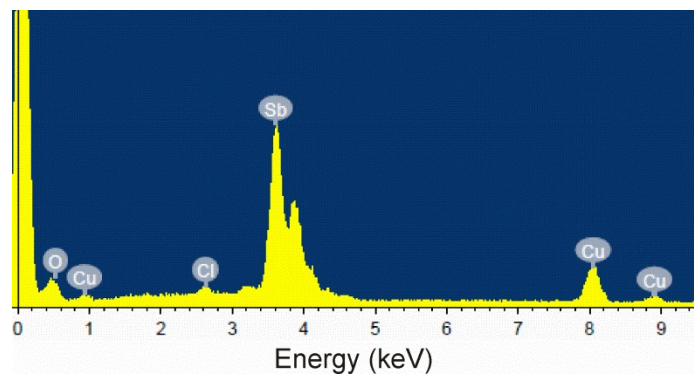

**Fig. S1** EDX analysis of the Sb deposit from 0.5 M  $\text{SbCl}_3$ /BMP-TFSI solution on Cu electrode at  $-1.7$  V vs. Pt quasi-reference electrode.

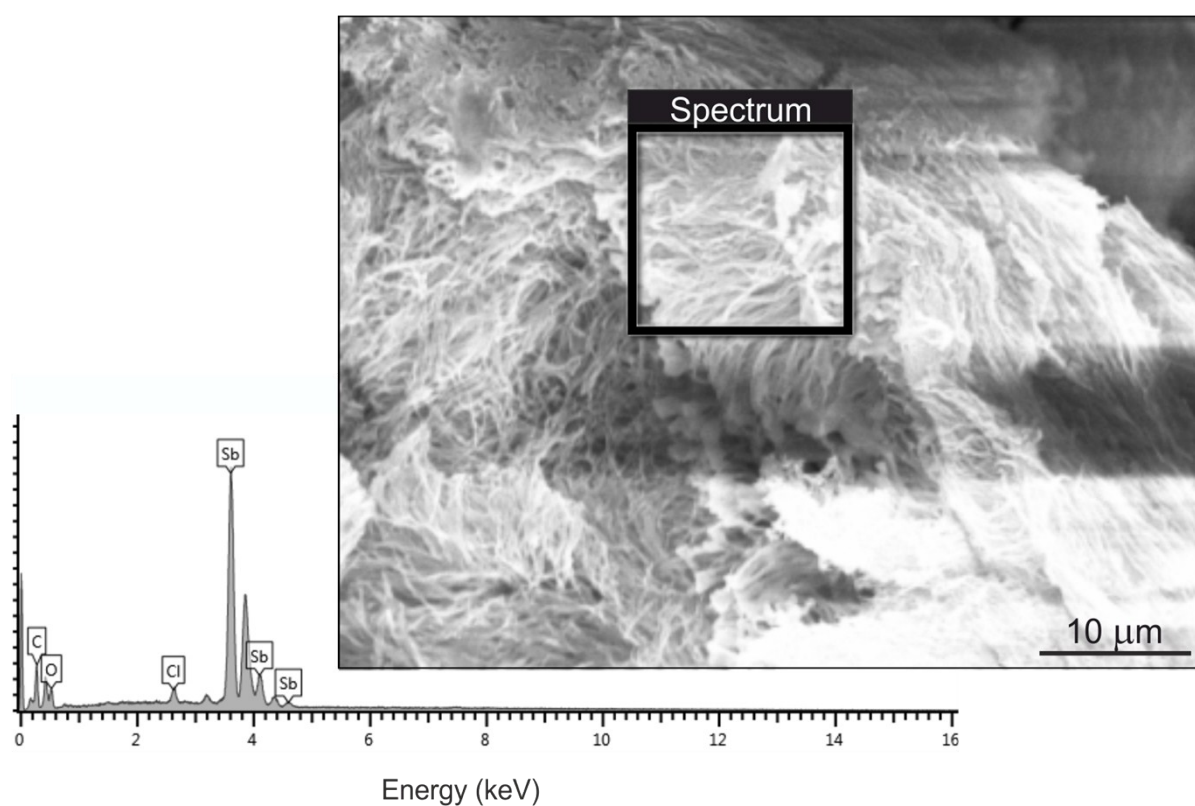

**Fig. S2** EDX analysis of the Sb deposit from 0.5 M  $\text{SbCl}_3$ /0.1 M  $\text{GaCl}_3$ /BMP-TFSI solution on glassy carbon electrode. The area from which the spectrum was recorded is also shown in the figure. Aside from Sb, only small residuals of C, O and Cl are detected. This indicates that Ga co-deposition can be ruled out at a potential of  $-1.9$  V vs. Pt quasi-reference electrode. Similar results were also obtained for Sb NWs on Cu electrode.

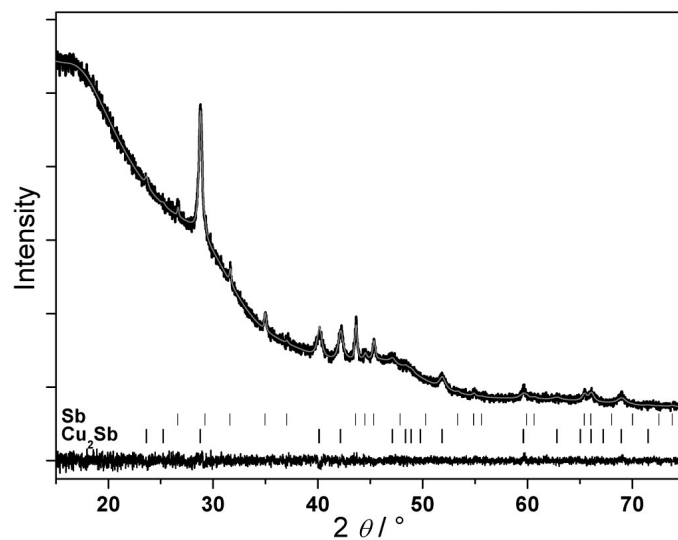

**Fig. S3** Observed (black line) and calculated (grey line) powder XRD patterns (Cu-K $\alpha$ 1, 1.5406 Å) of as-prepared Sb NWs ( $R3m$ ,  $a = 4.2803(10)$  Å,  $c = 11.274(4)$  Å) and the alloy Cu<sub>2</sub>Sb ( $P4/nmm$ ,  $a = 3.9946(8)$  Å,  $c = 6.097(2)$  Å) as well as difference profile of the fit. Reflection positions of the respective phases are indicated by vertical lines. The deposit was obtained from 0.5 M SbCl<sub>3</sub>/0.1 M GaCl<sub>3</sub>/BMP-TFSI solution on Cu electrode at  $-1.9$  V vs. Pt quasi-reference electrode.

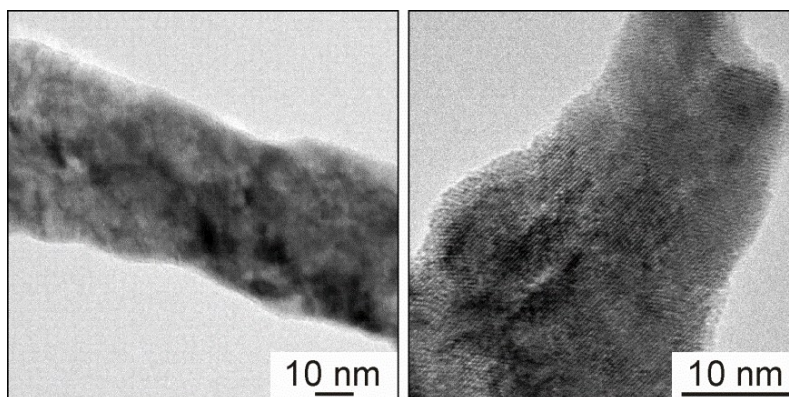

**Fig. S4** High-resolution TEM of Sb NWs demonstrating the high degree of crystallinity. The presence of a thin amorphous surface layer is also evident from the images.

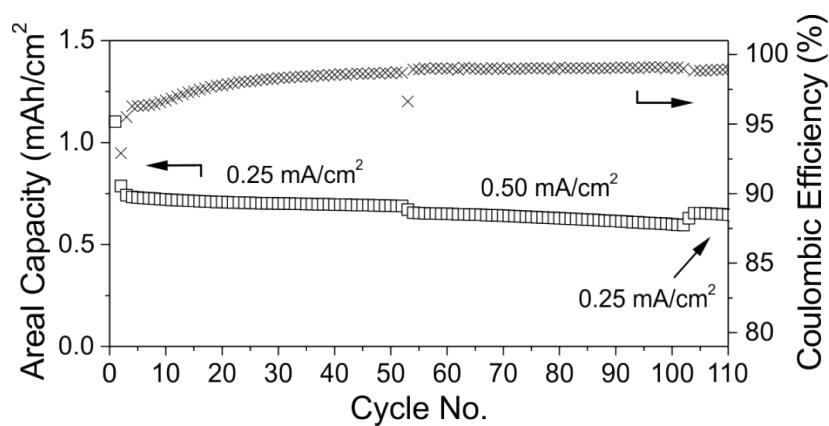

**Fig. S5** Capacity retention and Coulombic efficiency of Sb NW electrodes in Li cells. The first two cycles were performed at  $0.05 \text{ mA/cm}^2$  and then the current density was increased to  $0.25 \text{ mA/cm}^2$  and  $0.50 \text{ mA/cm}^2$ , respectively, for the subsequent cycles. As evident, the Sb NW electrodes exhibit good Li-storage performance. These results were achieved with a non-optimized electrode structure, thus indicating that the material holds promise for application in next generation Li-ion batteries.
